# Supplementary material for: Removal of contaminants from canal water using microwave synthesized zero valent iron nanoparticles
Source: Royal Society of Chemistry journal article supplement (doi:10.1039/d0ew00157k), 2020-01-01
Supplement: d0ew00157k1.pdf [file d0ew00157k1.pdf]

Supplementary information for

## Removal of contaminants from canal water using microwave synthesized zero valent iron nanoparticles

Salma Shad<sup>1</sup>, Marie-France Belinga-Desaunay Nault,<sup>2</sup> Sohail,<sup>3</sup> Nadia Bashir,<sup>1</sup> Iseult Lynch<sup>2</sup>

[i.lynch@bham.ac.uk](mailto:i.lynch@bham.ac.uk)

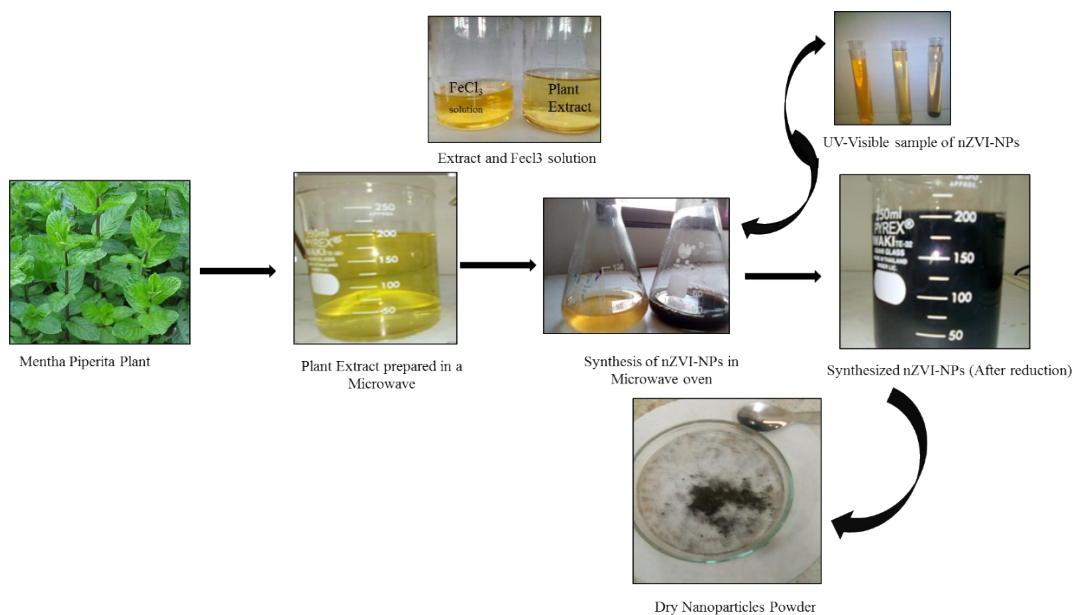

**Figure S1.** Synthesis of nanoscale zero valent iron nanoparticles (nZVI-NPs) from Mentha Piperita Plant

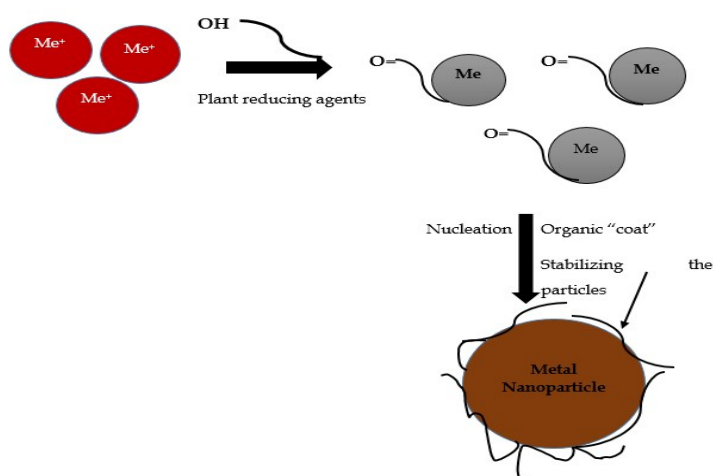

**Figure S2.** Schematic illustration of synthesis of *Mentha piperita* leaf extract stabilized nZVI-NPs.

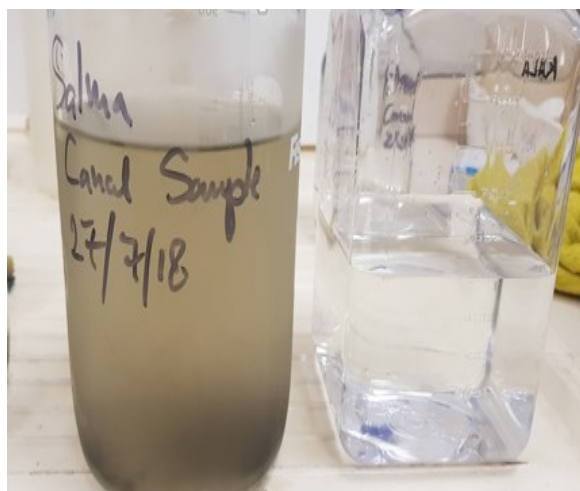

**Figure S3.** Water sample collected from the Worcester and Birmingham canal at the University of Birmingham on 27th July 2019, before (left) and after (right) filtration. Filtered samples were stored in the fridge until use.

**Table S1.** Qualitative analysis of phytochemicals of plant extract

| S. No | Phyto- constituents | Tests                                    |
|-------|---------------------|------------------------------------------|
| 1     | Alkaloids           | Wanger's test                            |
| 2     | Saponins            | Foam test                                |
| 3     | Flavonoids          | Alkaline reagent test                    |
| 4     | Tannins             | Braymer's test                           |
| 5     | Terpenoids          | Salkowki's test                          |
| 6     | Phlobatannins       | Phlobatannin (Precepitae) test           |
| 7     | Phenol              | Ferric chloride ( $\text{FeCl}_3$ ) test |
| 8     | Cardiac glucosides  | Keller kelliani's test                   |
| 9     | Proteins            | Ninhydrine test                          |
| 10    | Carbohydrates       | Molisch's test                           |
| 11    | Oil & fats          | Spot test                                |

**Table S2.** Change in the intensities of color during synthesis of nZVI-NPs

| Solutions                  | Before reduction | After reduction | Colour Intensity |
|----------------------------|------------------|-----------------|------------------|
| Mint leaves extract        | Light greenish   | Blackish colour | - +              |
| FeCl <sub>3</sub> solution | yellowish        | -               | + + +            |

**Table S3.** Experimental results of phytochemical screening test of *Mentha piperita* leaf extract

| S. No | Phytochemical Compound | Aqueous Extract Result |
|-------|------------------------|------------------------|
| 1     | Alkaloids              | Present                |
| 2     | Saponins               | Absent                 |
| 3     | Flavonoids             | Present                |
| 4     | Tannins                | Present                |
| 5     | Terpenoids             | Present                |
| 6     | Phlobatannin           | Absent                 |
| 7     | Phenol                 | Present                |
| 8     | Cardial glycoside      | Present                |
| 9     | Oil                    | Present                |
| 10    | Protein                | Absent                 |
| 11    | Carbohydrates          | Absent                 |
